# Supplementary material for: Rhizosphere Microbiomes of Amaranthus spp. Grown in Soils with Anthropogenic Polyelemental Anomalies
Source: MDPI journal article supplement (doi:10.3390/agronomy13030759), 2023-03-06
Supplement: s1 [file s1]

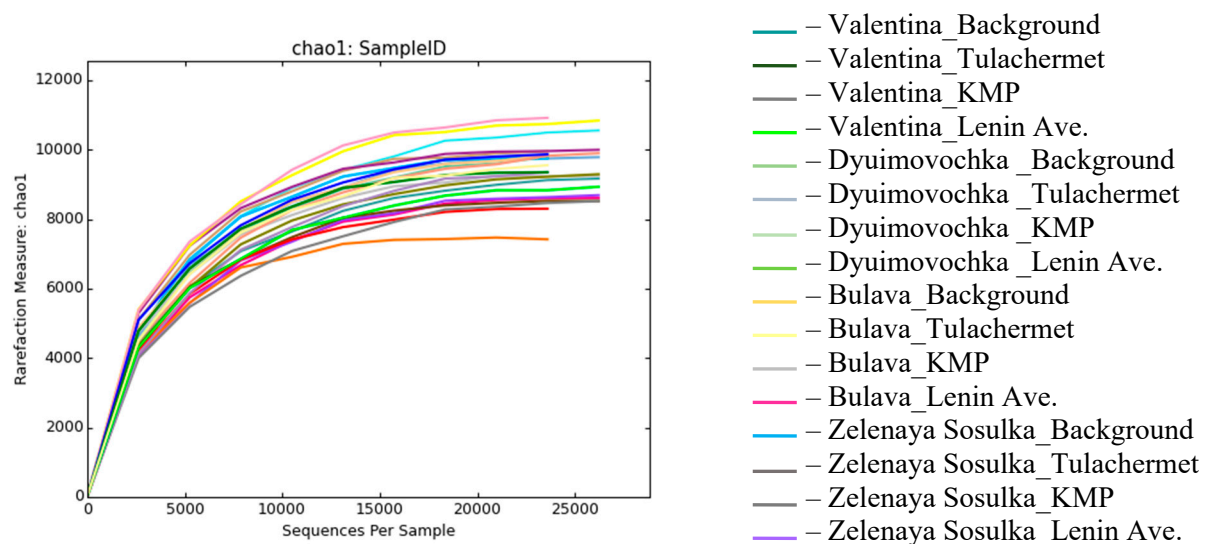

Figure S1. Dependence of the number of detected taxa (OTUs) on the number of sequences obtained for amaranth rhizosphere soil samples.
