# Supplementary material for: Rhizosphere Microbiomes of Amaranthus spp. Grown in Soils with Anthropogenic Polyelemental Anomalies
Source: MDPI journal article supplement (doi:10.3390/agronomy13030759), 2023-03-06
Supplement: s1 [file s1]

Table S2. Taxonomic structure of rhizosphere microbial communities of amaranths studied, %.

| Associated OTUs                                                                                       | Background |             |        |                  | Tulachermet |             |        |                  | KGIW      |             |        |                  | Lenin Ave. |             |        |                  |
|-------------------------------------------------------------------------------------------------------|------------|-------------|--------|------------------|-------------|-------------|--------|------------------|-----------|-------------|--------|------------------|------------|-------------|--------|------------------|
|                                                                                                       | Valentina  | Dyimovochka | Bulava | Zelenaya Sosulka | Valentina   | Dyimovochka | Bulava | Zelenaya Sosulka | Valentina | Dyimovochka | Bulava | Zelenaya Sosulka | Valentina  | Dyimovochka | Bulava | Zelenaya Sosulka |
| p_Acidobacteriota;c_Acidobacteriae;o_Acidobacteriales;f_uncultured;g_uncultured                       | 0.00       | 0.00        | 0.00   | 0.00             | 0.05        | 0.00        | 0.00   | 0.00             | 0.22      | 0.00        | 1.62   | 0.00             | 0.11       | 0.00        | 0.00   | 0.00             |
| p_Acidobacteriota;c_Acidobacteriae;o_Bryobacteriales;f_Bryobacteraceae;g_Bryobacter                   | 0.58       | 0.31        | 0.63   | 0.99             | 0.96        | 0.89        | 0.80   | 1.07             | 0.37      | 1.18        | 1.36   | 0.50             | 0.85       | 0.41        | 1.34   | 0.71             |
| p_Acidobacteriota;c_Acidobacteriae;o_Solibacterales;f_Solibacteraceae;g_Candidatus_Solibacter         | 0.17       | 0.31        | 0.08   | 0.23             | 0.24        | 0.38        | 0.34   | 0.00             | 0.21      | 0.31        | 1.30   | 0.47             | 0.41       | 0.14        | 0.19   | 0.20             |
| p_Acidobacteriota;c_Holophagae;o_Subgroup_7;f_Subgroup_7;g_Subgroup_7                                 | 0.49       | 0.17        | 0.40   | 0.70             | 0.29        | 0.66        | 0.41   | 0.39             | 0.41      | 0.46        | 0.57   | 1.13             | 0.53       | 0.46        | 0.44   | 1.43             |
| p_Acidobacteriota;c_Thermoanaerobactria;o_Thermoanaerobactriales;f_Thermoanaerobactriae;g_Subgroup_10 | 0.90       | 0.69        | 2.13   | 0.83             | 1.25        | 1.57        | 2.03   | 2.39             | 2.61      | 2.36        | 1.63   | 1.19             | 0.41       | 0.81        | 2.81   | 1.35             |
| p_Acidobacteriota;c_Vicinamibacteria;o_Vicinamibacterales;f_uncultured;g_uncultured                   | 0.83       | 2.16        | 1.08   | 1.33             | 0.37        | 1.15        | 0.94   | 1.55             | 0.32      | 1.28        | 1.52   | 1.54             | 0.47       | 0.51        | 0.93   | 1.08             |
| p_Acidobacteriota;c_Vicinamibacteria;o_Vicinamibacterales;f_Vicinamibacteraceae;g_Vicinamibacteraceae | 1.47       | 2.15        | 1.73   | 1.50             | 0.54        | 1.04        | 1.47   | 1.97             | 0.55      | 1.74        | 1.62   | 3.21             | 0.94       | 1.18        | 1.58   | 2.62             |
| p_Actinobacteriota;c_Actinobacteriae;o_Actinomarinales;f_uncultured;g_uncultured                      | 0.84       | 1.56        | 0.61   | 0.51             | 0.91        | 1.28        | 0.97   | 0.65             | 1.36      | 1.03        | 0.49   | 0.99             | 0.22       | 0.79        | 1.27   | 1.20             |
| p_Actinobacteriota;c_Actinobacteriae;o_Actinomarinales;f_Actinomarinales;g_Actinomarinales            | 0.39       | 0.17        | 0.30   | 0.03             | 0.00        | 0.00        | 0.64   | 0.00             | 0.26      | 0.00        | 1.10   | 1.11             | 0.29       | 0.19        | 0.71   | 0.64             |
| p_Actinobacteriota;c_Actinobacteriae;o_Actinomarinales;f_Actinomarinales;g_Actinomarinales            | 0.57       | 0.84        | 0.42   | 0.85             | 0.15        | 0.84        | 0.48   | 1.06             | 0.53      | 0.50        | 0.63   | 1.01             | 0.11       | 0.39        | 0.27   | 0.81             |
| p_Actinobacteriota;c_Actinobacteriae;o_Actinomarinales;f_Actinomarinales;g_Actinomarinales            | 0.67       | 0.75        | 0.56   | 0.66             | 0.35        | 0.52        | 0.44   | 0.92             | 0.72      | 0.51        | 0.61   | 1.07             | 0.13       | 0.97        | 0.64   | 1.30             |
| p_Actinobacteriota;c_Actinobacteriae;o_Actinomarinales;f_Actinomarinales;g_Actinomarinales            | 1.90       | 2.41        | 2.37   | 0.88             | 1.45        | 1.61        | 3.38   | 2.34             | 1.25      | 1.03        | 2.06   | 2.13             | 0.70       | 1.38        | 1.36   | 2.43             |
| p_Actinobacteriota;c_Actinobacteriae;o_Actinomarinales;f_Actinomarinales;g_Actinomarinales            | 3.26       | 3.70        | 1.85   | 2.37             | 1.83        | 2.06        | 2.15   | 2.07             | 3.30      | 1.61        | 2.40   | 4.74             | 1.30       | 2.12        | 2.26   | 4.42             |
| p_Actinobacteriota;c_Actinobacteriae;o_Actinomarinales;f_Actinomarinales;g_Actinomarinales            | 0.59       | 1.02        | 1.22   | 1.40             | 0.88        | 1.25        | 1.76   | 1.46             | 0.85      | 1.23        | 1.35   | 0.71             | 1.14       | 1.18        | 1.42   | 0.73             |
| p_Actinobacteriota;c_Actinobacteriae;o_Actinomarinales;f_Actinomarinales;g_Actinomarinales            | 0.67       | 1.11        | 0.90   | 0.74             | 0.22        | 0.75        | 0.83   | 0.92             | 0.43      | 0.55        | 0.55   | 0.39             | 1.13       | 0.99        | 0.75   | 0.00             |
| p_Actinobacteriota;c_Actinobacteriae;o_Actinomarinales;f_Actinomarinales;g_Actinomarinales            | 1.07       | 1.07        | 0.85   | 0.66             | 0.52        | 0.59        | 0.87   | 1.11             | 0.93      | 0.64        | 0.83   | 0.86             | 0.67       | 0.53        | 0.00   | 0.35             |
| p_Actinobacteriota;c_Actinobacteriae;o_Actinomarinales;f_Actinomarinales;g_Actinomarinales            | 0.70       | 0.65        | 0.51   | 0.79             | 0.38        | 0.28        | 0.53   | 0.60             | 0.37      | 0.44        | 0.47   | 1.69             | 0.56       | 0.56        | 0.57   | 0.72             |
| p_Actinobacteriota;c_Actinobacteriae;o_Actinomarinales;f_Actinomarinales;g_Actinomarinales            | 0.20       | 0.86        | 4.21   | 1.65             | 0.05        | 0.92        | 0.87   | 1.63             | 1.30      | 0.85        | 0.78   | 0.27             | 1.87       | 0.96        | 4.74   | 2.00             |
| p_Actinobacteriota;c_Actinobacteriae;o_Actinomarinales;f_Actinomarinales;g_Actinomarinales            | 1.65       | 0.47        | 0.59   | 0.40             | 1.99        | 0.57        | 0.00   | 0.00             | 1.00      | 0.90        | 0.28   | 0.14             | 1.04       | 0.86        | 0.48   | 0.00             |
| p_Actinobacteriota;c_Actinobacteriae;o_Actinomarinales;f_Actinomarinales;g_Actinomarinales            | 2.23       | 3.72        | 3.65   | 2.70             | 2.54        | 1.61        | 2.99   | 4.13             | 3.60      | 1.81        | 1.87   | 2.14             | 1.53       | 2.01        | 1.50   | 2.32             |
| p_Actinobacteriota;c_Actinobacteriae;o_Actinomarinales;f_Actinomarinales;g_Actinomarinales            | 0.58       | 0.33        | 0.89   | 2.38             | 0.54        | 0.58        | 0.50   | 1.78             | 0.86      | 0.00        | 0.96   | 0.16             | 0.00       | 0.00        | 0.72   | 0.38             |
| p_Actinobacteriota;c_Actinobacteriae;o_Actinomarinales;f_Actinomarinales;g_Actinomarinales            | 1.01       | 0.13        | 1.12   | 0.30             | 2.86        | 1.50        | 0.88   | 0.00             | 3.36      | 1.38        | 0.51   | 0.20             | 2.70       | 1.24        | 0.37   | 0.10             |
| p_Actinobacteriota;c_Actinobacteriae;o_Actinomarinales;f_Actinomarinales;g_Actinomarinales            | 0.48       | 2.24        | 2.50   | 1.54             | 1.19        | 1.48        | 1.43   | 1.70             | 1.55      | 1.56        | 0.86   | 1.45             | 2.12       | 1.18        | 2.22   | 1.31             |
| p_Actinobacteriota;c_Actinobacteriae;o_Actinomarinales;f_Actinomarinales;g_Actinomarinales            | 2.34       | 4.64        | 2.11   | 2.17             | 2.33        | 3.33        | 3.74   | 2.86             | 3.04      | 1.48        | 3.71   | 2.93             | 1.76       | 3.71        | 2.22   | 1.88             |
| p_Actinobacteriota;c_Actinobacteriae;o_Actinomarinales;f_Actinomarinales;g_Actinomarinales            | 2.12       | 2.41        | 0.87   | 1.67             | 2.09        | 1.66        | 1.87   | 1.00             | 1.82      | 1.27        | 2.99   | 1.11             | 3.72       | 1.76        | 0.45   | 0.85             |
| p_Actinobacteriota;c_Actinobacteriae;o_Actinomarinales;f_Actinomarinales;g_Actinomarinales            | 2.61       | 5.12        | 3.48   | 2.11             | 1.81        | 2.82        | 6.26   | 2.14             | 3.36      | 2.50        | 3.69   | 2.39             | 2.04       | 4.73        | 3.00   | 2.54             |
| p_Actinobacteriota;c_Actinobacteriae;o_Actinomarinales;f_Actinomarinales;g_Actinomarinales            | 0.01       | 0.00        | 0.61   | 0.00             | 0.00        | 0.40        | 0.69   | 0.34             | 0.04      | 0.49        | 0.70   | 0.21             | 1.12       | 0.55        | 0.30   | 0.00             |
| p_Actinobacteriota;c_Actinobacteriae;o_Actinomarinales;f_Actinomarinales;g_Actinomarinales            | 0.37       | 1.24        | 0.84   | 1.06             | 0.63        | 0.83        | 1.03   | 1.00             | 1.20      | 0.39        | 0.70   | 0.54             | 1.15       | 1.10        | 1.05   | 0.61             |
| p_Actinobacteriota;c_Actinobacteriae;o_Actinomarinales;f_Actinomarinales;g_Actinomarinales            | 0.43       | 1.00        | 0.21   | 0.34             | 0.39        | 0.38        | 0.53   | 0.16             | 0.71      | 0.55        | 0.24   | 0.54             | 0.19       | 0.48        | 0.41   | 0.51             |
| p_Bacteroidota;c_Bacteroidia;o_Chitinophagales;f_Chitinophagaceae;g_uncultured                        | 0.35       | 0.40        | 0.00   | 0.31             | 0.19        | 0.16        | 0.19   | 0.10             | 0.52      | 0.12        | 0.21   | 0.65             | 0.29       | 0.00        | 0.00   | 1.01             |
| p_Bacteroidota;c_Bacteroidia;o_Chitinophagales;f_Chitinophagaceae;g_Terrimonas                        | 0.00       | 0.27        | 0.95   | 0.77             | 0.06        | 0.16        | 0.16   | 0.51             | 0.07      | 0.34        | 0.10   | 0.58             | 0.00       | 0.10        | 1.77   | 0.68             |
| p_Bacteroidota;c_Bacteroidia;o_Chitinophagales;f_Chitinophagaceae;g_Terrimonas                        | 0.01       | 0.14        | 0.00   | 0.19             | 0.02        | 2.06        | 0.00   | 0.07             | 0.32      | 0.47        | 0.00   | 0.11             | 0.16       | 0.66        | 0.00   | 0.00             |
| p_Chloroflexi;c_Chloroflexia;o_Chloroflexales;f_Chloroflexaceae;g_Chloroflexia                        | 1.05       | 0.00        | 0.00   | 0.00             | 0.46        | 0.05        | 0.00   | 0.06             | 0.17      | 0.28        | 0.00   | 0.00             | 0.00       | 0.00        | 0.00   | 0.00             |
| p_Chloroflexi;c_Chloroflexia;o_Chloroflexales;f_Chloroflexaceae;g_Chloroflexia                        | 1.03       | 0.00        | 0.03   | 0.03             | 1.61        | 0.19        | 0.02   | 0.00             | 0.33      | 0.00        | 0.00   | 0.00             | 0.07       | 0.14        | 0.00   | 0.00             |
| p_Chloroflexi;c_Chloroflexia;o_Chloroflexales;f_Chloroflexaceae;g_Chloroflexia                        | 0.85       | 0.38        | 0.15   | 0.00             | 1.02        | 0.00        | 0.21   | 0.12             | 0.16      | 0.00        | 0.00   | 0.08             | 0.00       | 0.15        | 0.19   | 0.63             |
| p_Chloroflexi;c_Chloroflexia;o_Chloroflexales;f_Chloroflexaceae;g_Chloroflexia                        | 3.35       | 1.65        | 2.60   | 2.06             | 2.77        | 1.22        | 1.24   | 3.17             | 1.37      | 0.58        | 0.78   | 1.20             | 1.80       | 0.77        | 6.30   | 3.77             |
| p_Chloroflexi;c_Chloroflexia;o_Chloroflexales;f_Chloroflexaceae;g_Chloroflexia                        | 1.24       | 2.13        | 2.91   | 1.55             | 1.45        | 1.75        | 4.52   | 1.93             | 1.68      | 1.00        | 2.48   | 1.13             | 0.38       | 1.70        | 1.19   | 0.82             |
| p_Chloroflexi;c_Chloroflexia;o_Chloroflexales;f_Chloroflexaceae;g_Chloroflexia                        | 0.90       | 1.61        | 1.24   | 1.01             | 1.39        | 1.14        | 1.51   | 0.80             | 1.93      | 0.72        | 1.44   | 1.55             | 0.69       | 1.61        | 1.41   | 1.02             |
| p_Chloroflexi;c_Chloroflexia;o_Chloroflexales;f_Chloroflexaceae;g_Chloroflexia                        | 2.65       | 4.38        | 1.59   | 2.82             | 2.46        | 2.55        | 2.65   | 1.79             | 4.43      | 1.28        | 2.52   | 3.24             | 2.38       | 3.03        | 1.64   | 3.71             |
| p_Cyanobacteria;c_Cyanobacteriia;o_Cyanobacteriales;f_Coleofasciculaceae;g_Microcoleus_PCC-7113       | 4.12       | 0.00        | 0.47   | 0.00             | 8.19        | 3.81        | 0.07   | 0.00             | 0.63      | 13.54       | 0.00   | 0.00             | 0.95       | 0.19        | 0.00   | 0.00             |

| Associated OTUs                                                                                                          | Background |              |        |                  | Tulachermet |              |        |                  | KGIW      |              |        |                  | Lenin Ave. |              |        |                  |
|--------------------------------------------------------------------------------------------------------------------------|------------|--------------|--------|------------------|-------------|--------------|--------|------------------|-----------|--------------|--------|------------------|------------|--------------|--------|------------------|
|                                                                                                                          | Valentina  | Dyuimovochka | Bulava | Zelenaya Sosulka | Valentina   | Dyuimovochka | Bulava | Zelenaya Sosulka | Valentina | Dyuimovochka | Bulava | Zelenaya Sosulka | Valentina  | Dyuimovochka | Bulava | Zelenaya Sosulka |
| p_Cyanobacteria;c_Cyanobacteriia;o_Cyanobacteriales;f_Phormidiaceae;g_Phormidium_IAM_M-71                                | 4.94       | 0.00         | 1.07   | 0.12             | 4.97        | 2.55         | 0.13   | 0.01             | 1.94      | 1.15         | 0.06   | 0.00             | 1.19       | 3.41         | 0.00   | 0.00             |
| p_Cyanobacteria;c_Cyanobacteriia;o_Cyanobacteriales;f_Phormidiaceae;g_Tychonema_CCAP_1459-11B                            | 0.34       | 2.49         | 0.67   | 0.00             | 0.77        | 0.05         | 0.00   | 0.00             | 3.85      | 0.00         | 0.00   | 0.00             | 0.05       | 0.57         | 0.00   | 0.00             |
| p_Cyanobacteria;c_Cyanobacteriia;o_Cyanobacteriales;f_Phormidiaceae;g_uncultured                                         | 1.02       | 0.00         | 0.00   | 0.11             | 1.08        | 0.40         | 0.08   | 0.08             | 0.82      | 1.12         | 0.17   | 0.00             | 1.15       | 1.55         | 0.00   | 0.00             |
| p_Firmicutes;c_Bacilli;o_Bacillales;f_Bacillaceae;g_Bacillus                                                             | 1.09       | 1.14         | 1.00   | 1.32             | 1.22        | 0.70         | 1.61   | 1.99             | 0.51      | 0.43         | 2.48   | 2.12             | 2.42       | 0.31         | 2.04   | 0.90             |
| p_Gemmatimonadota;c_Gemmatimonadetes;o_Gemmatimonadales;f_Gemmatimonadaceae;g_uncultured                                 | 0.67       | 1.32         | 0.77   | 1.33             | 0.17        | 1.39         | 1.02   | 1.06             | 0.26      | 1.10         | 1.31   | 2.96             | 0.31       | 0.37         | 1.00   | 2.45             |
| p_Gemmatimonadota;c_Longimicrobia;o_Longimicrobiales;f_Longimicrobiaceae;g_YC-ZSS-LKJ147                                 | 0.89       | 0.00         | 0.57   | 0.07             | 2.21        | 0.49         | 0.41   | 0.23             | 0.80      | 0.65         | 0.54   | 0.00             | 2.35       | 1.63         | 0.15   | 0.00             |
| p_Methylomirabilota;c_Methylomirabilia;o_Rokubacteriales;f_Rokubacteriales;g_Rokubacteriales                             | 0.18       | 0.66         | 0.14   | 0.05             | 0.05        | 0.10         | 0.19   | 0.27             | 0.26      | 0.33         | 0.27   | 1.44             | 0.10       | 0.14         | 0.33   | 0.95             |
| p_Myxococcota;c_Polyangia;o_Haliangiales;f_Haliangiaceae;g_Haliangium                                                    | 0.51       | 0.69         | 0.78   | 1.07             | 0.93        | 0.57         | 0.33   | 0.93             | 0.35      | 0.87         | 0.47   | 0.96             | 0.28       | 0.27         | 0.91   | 1.26             |
| p_Myxococcota;c_Polyangia;o_Polyangiales;f_Blrii41;g_Blrii41                                                             | 0.23       | 0.61         | 0.77   | 2.40             | 0.00        | 0.33         | 0.23   | 1.09             | 0.02      | 0.63         | 0.00   | 0.18             | 0.29       | 0.22         | 1.07   | 0.54             |
| p_Plactomycetota;c_Phycisphaerae;o_Tepidisphaerales;f_WD2101_soil_group;g_WD2101_soil_group                              | 0.23       | 0.46         | 0.26   | 0.49             | 0.05        | 1.02         | 0.55   | 0.51             | 0.32      | 0.80         | 0.58   | 1.10             | 0.59       | 0.13         | 0.43   | 0.58             |
| p_Proteobacteria;c_Alphaproteobacteria;o_Azospirillales;f_Azospirillaceae;g_Skermanella                                  | 0.46       | 0.19         | 1.22   | 0.67             | 0.80        | 0.79         | 1.04   | 0.51             | 0.68      | 0.57         | 0.37   | 0.00             | 0.49       | 0.99         | 0.57   | 0.00             |
| p_Proteobacteria;c_Alphaproteobacteria;o_Sphingomonadales;f_Sphingomonadaceae;g_                                         | 0.89       | 0.73         | 0.86   | 1.06             | 0.54        | 0.77         | 1.12   | 0.86             | 2.22      | 0.69         | 0.09   | 0.60             | 0.78       | 0.89         | 0.60   | 1.05             |
| p_Proteobacteria;c_Alphaproteobacteria;o_Sphingomonadales;f_Sphingomonadaceae;g_Novosphingobium                          | 1.84       | 2.66         | 1.90   | 2.87             | 1.10        | 1.33         | 2.34   | 2.08             | 2.07      | 0.62         | 1.01   | 3.04             | 1.71       | 2.73         | 2.16   | 2.82             |
| p_Proteobacteria;c_Alphaproteobacteria;o_Sphingomonadales;f_Sphingomonadaceae;g_Sphingomonas                             | 0.62       | 0.29         | 0.67   | 0.95             | 1.20        | 1.69         | 0.89   | 1.33             | 2.14      | 0.57         | 1.16   | 0.56             | 2.14       | 0.80         | 0.71   | 0.29             |
| p_Proteobacteria;c_Alphaproteobacteria;o_Rhizobiales;f_Beijerinckiaceae;g_                                               | 0.01       | 0.10         | 0.49   | 0.11             | 0.47        | 0.49         | 0.02   | 0.46             | 0.17      | 0.47         | 0.65   | 0.18             | 1.06       | 0.04         | 0.41   | 0.08             |
| p_Proteobacteria;c_Alphaproteobacteria;o_Rhizobiales;f_Beijerinckiaceae;g_Methylobacterium-Methylobacterium              | 0.15       | 0.00         | 0.00   | 0.00             | 1.36        | 0.00         | 0.00   | 0.01             | 0.65      | 0.00         | 0.00   | 0.00             | 5.19       | 0.26         | 0.00   | 0.00             |
| p_Proteobacteria;c_Alphaproteobacteria;o_Rhizobiales;f_Rhizobiaceae;g_                                                   | 0.56       | 0.62         | 1.16   | 1.00             | 0.53        | 1.02         | 0.49   | 1.13             | 0.94      | 0.41         | 0.44   | 0.48             | 0.14       | 0.80         | 1.25   | 0.43             |
| p_Proteobacteria;c_Alphaproteobacteria;o_Rhizobiales;f_Rhizobiaceae;g_Allorhizobium-Neorhizobium-Pararhizobium-Rhizobium | 0.21       | 0.21         | 0.30   | 0.32             | 0.09        | 3.40         | 0.19   | 1.22             | 0.21      | 0.85         | 0.27   | 1.20             | 1.70       | 3.39         | 0.37   | 0.20             |
| p_Proteobacteria;c_Alphaproteobacteria;o_Rhizobiales;f_Xanthobacteraceae;g_uncultured                                    | 0.00       | 0.95         | 0.38   | 0.82             | 0.23        | 0.14         | 0.52   | 0.77             | 0.14      | 0.39         | 1.40   | 0.43             | 0.39       | 0.00         | 0.24   | 0.00             |
| p_Proteobacteria;c_Alphaproteobacteria;o_Rhizobiales;f_Xanthobacteraceae;g_                                              | 0.62       | 0.93         | 0.34   | 0.37             | 0.31        | 0.61         | 0.46   | 0.41             | 0.27      | 0.44         | 1.12   | 0.96             | 0.00       | 0.40         | 1.14   | 0.99             |
| p_Proteobacteria;c_Gammaproteobacteria;o_Burkholderiales;f_Comamonadaceae;g_                                             | 0.85       | 0.36         | 1.92   | 1.70             | 0.34        | 0.88         | 0.67   | 1.43             | 0.82      | 0.83         | 0.55   | 0.72             | 1.05       | 0.60         | 0.84   | 1.43             |
| p_Proteobacteria;c_Gammaproteobacteria;o_Burkholderiales;f_Nitrosomonadaceae;g_Ellin6067                                 | 0.46       | 0.66         | 0.81   | 0.94             | 0.16        | 0.67         | 0.58   | 0.87             | 0.27      | 0.86         | 1.34   | 0.89             | 0.36       | 0.24         | 1.32   | 1.91             |
| p_Proteobacteria;c_Gammaproteobacteria;o_Burkholderiales;f_Nitrosomonadaceae;g_MND1                                      | 0.29       | 0.48         | 0.30   | 0.47             | 0.42        | 0.89         | 0.75   | 0.72             | 0.54      | 0.72         | 0.53   | 0.97             | 0.47       | 0.00         | 0.85   | 1.10             |
| p_Proteobacteria;c_Gammaproteobacteria;o_Burkholderiales;f_Oxalobacteraceae;g_Massilia                                   | 0.58       | 0.12         | 0.04   | 0.19             | 0.13        | 0.35         | 0.10   | 0.00             | 0.38      | 0.34         | 0.34   | 0.56             | 1.37       | 0.99         | 0.06   | 0.12             |
| p_Proteobacteria;c_Gammaproteobacteria;o_Pseudomonadales;f_Pseudomonadaceae;g_Pseudomonas                                | 0.17       | 0.14         | 0.10   | 0.21             | 0.02        | 0.72         | 0.06   | 0.00             | 0.07      | 0.12         | 0.21   | 1.69             | 0.21       | 7.76         | 0.00   | 0.00             |
| p_Proteobacteria;c_Gammaproteobacteria;o_Gammaproteobacteria_Incertae_Sedis;f_Unknown_Family;g_Acidibacter               | 0.52       | 0.77         | 0.43   | 0.70             | 0.09        | 0.36         | 0.45   | 1.15             | 0.18      | 0.76         | 0.37   | 0.44             | 0.39       | 0.19         | 0.58   | 0.61             |

Note: Only taxa, the share of which was  $\geq 1\%$  are given in this table.
